# Supplementary material for: THY1 (CD90) Maintains the Adherens Junctions in Nasopharyngeal Carcinoma via Inhibition of SRC Activation
Source: MDPI journal article supplement (doi:10.3390/cancers15072189), 2023-04-06

## **Supplementary File S1: Remarks on the original WB blot.**

### **1. On the molecular weight marker:**

When performing western-blot, we were using PageRuler Prestained Protein Ladder from ThermoFisher (Cat\_No.: 26616) as protein size standard. All the signal of western-blot were captured through traditional X-ray film exposure. So, the protein molecular weight marker, which did not have chemiluminescence property by itself, could not be visualized on the X-ray film. Protein molecular weight markers were marked on the X-ray film by hand (by overlapping the exposed X-ray film onto the original membrane, and mark down the position of the ladder). In this supplementary file, the hand-marked ladder positions were high lighted with **red solid-line rectangles**.

2. The bands shown in the manuscript were high-lighted with **dashed-line red rectangles**.

### **3. On the “full blot” requirement:**

**During the western blot process, blots were already trimmed to appropriate size for the target protein.** Therefore, the WB pictures inside the WB supplementary file represent the original western blot result of the full-blot.

Fig 1B

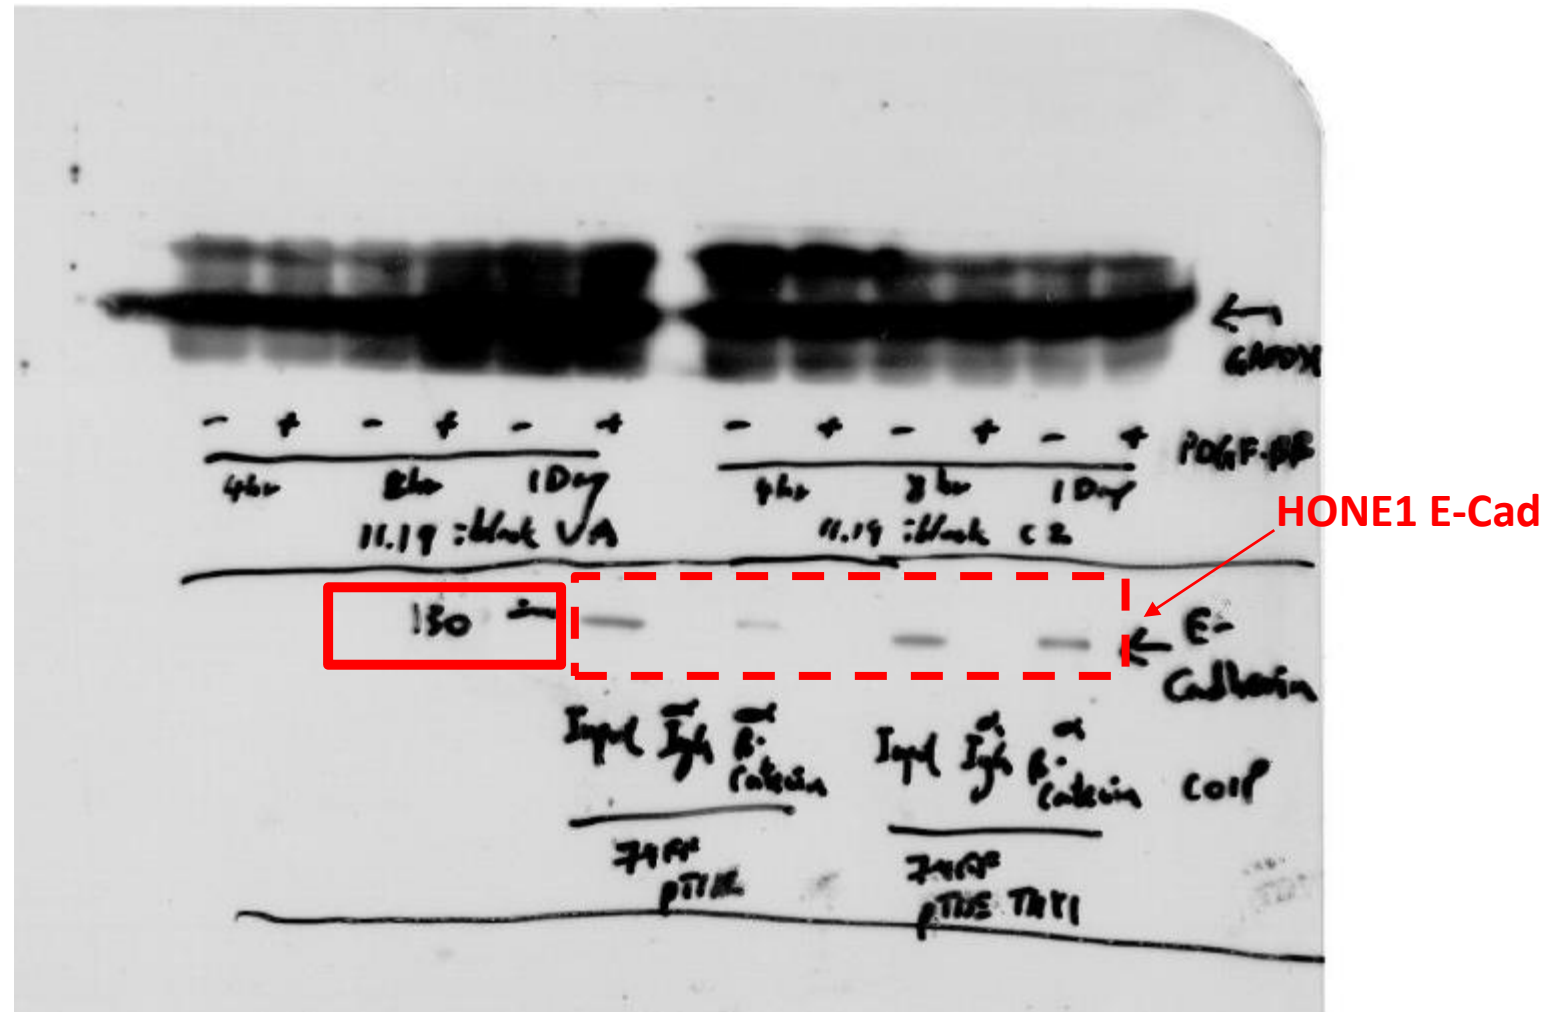

Fig 1B

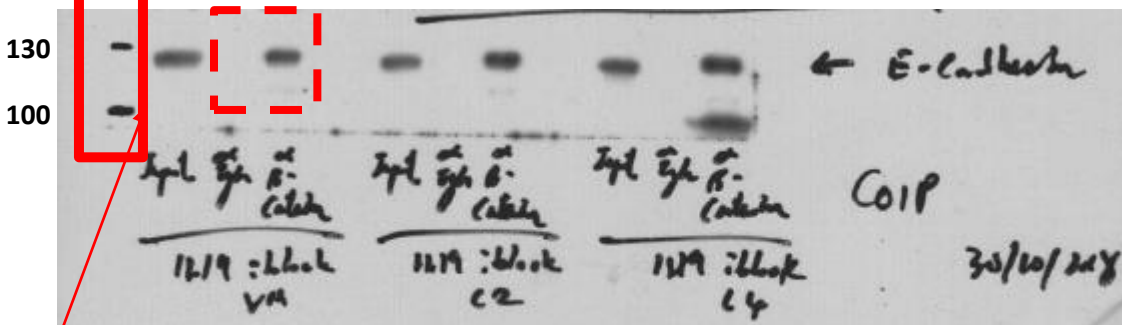

11.19 E-Cad

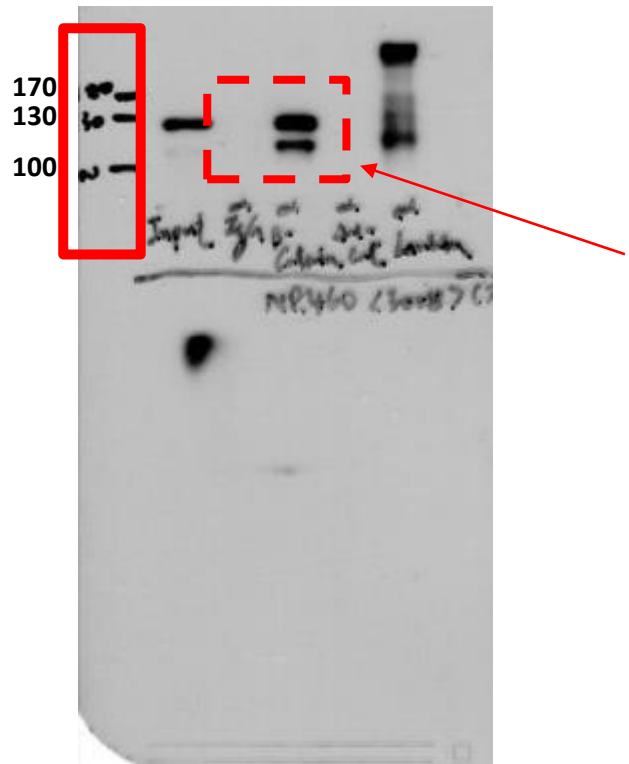

NP460 E-Cad

Fig 1C

Calpain 1

Survivin

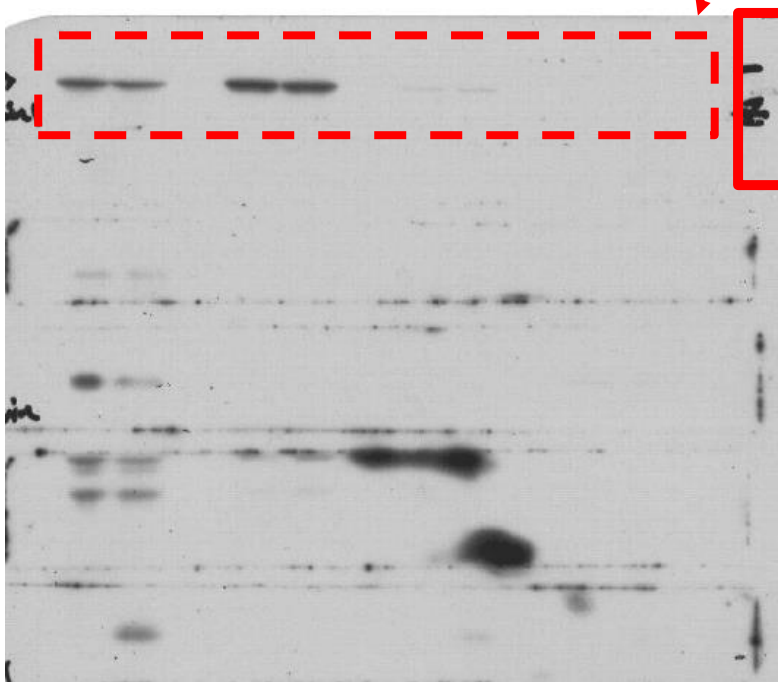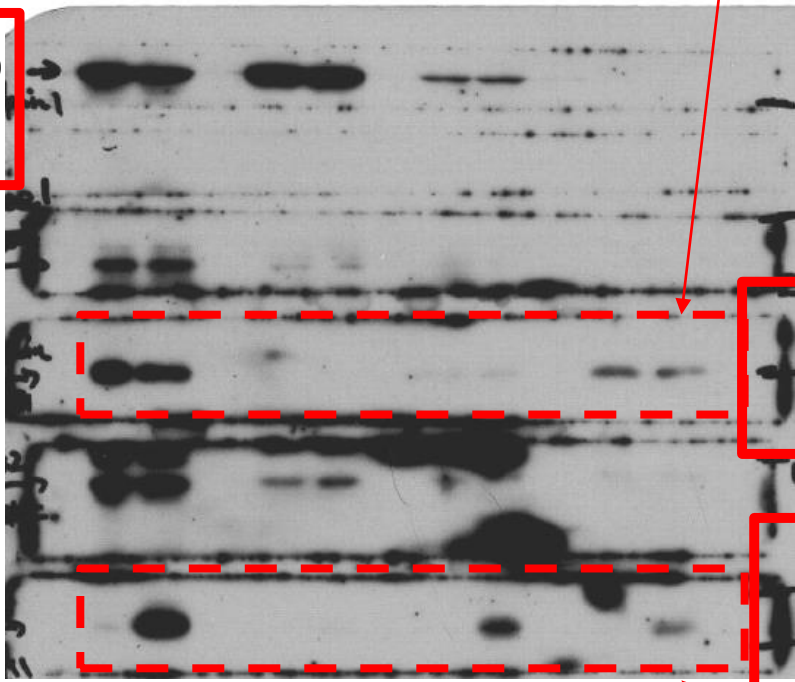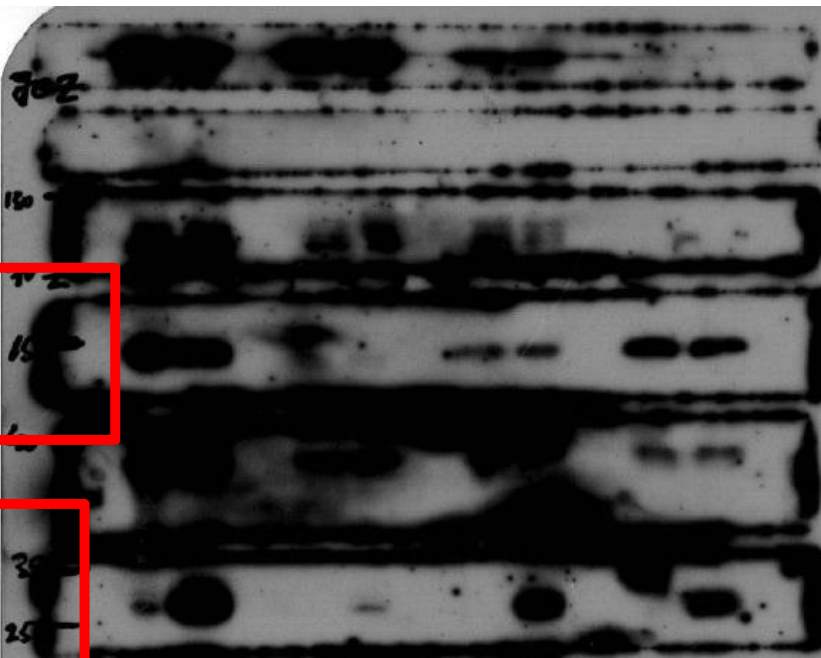

Short exposure

Long exposure x1

Long exposure x2

THY1

Fig 1C

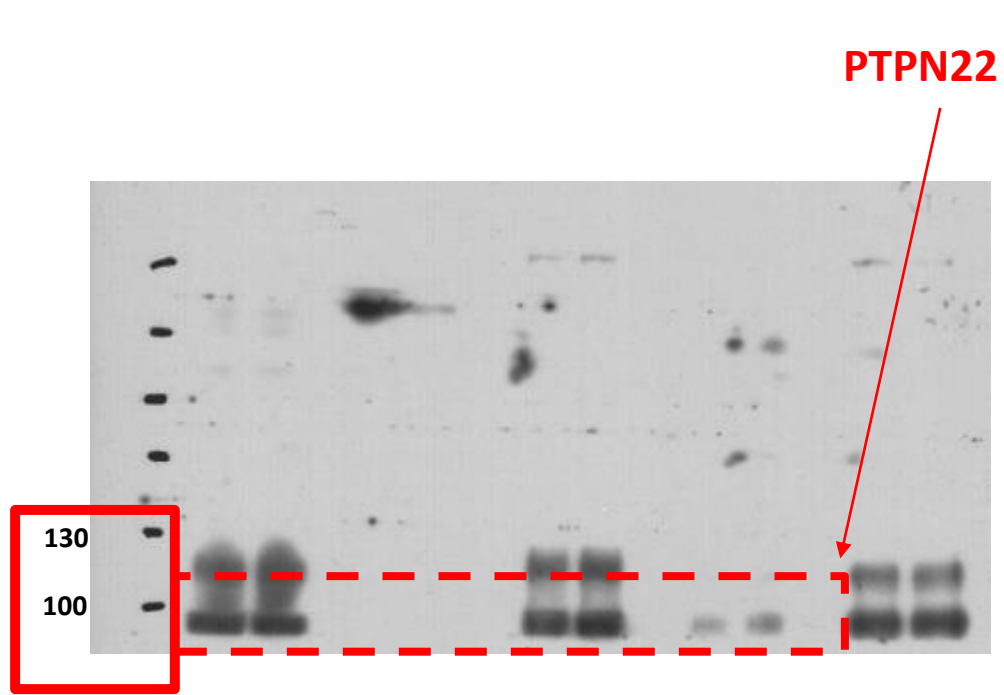

Short exposure

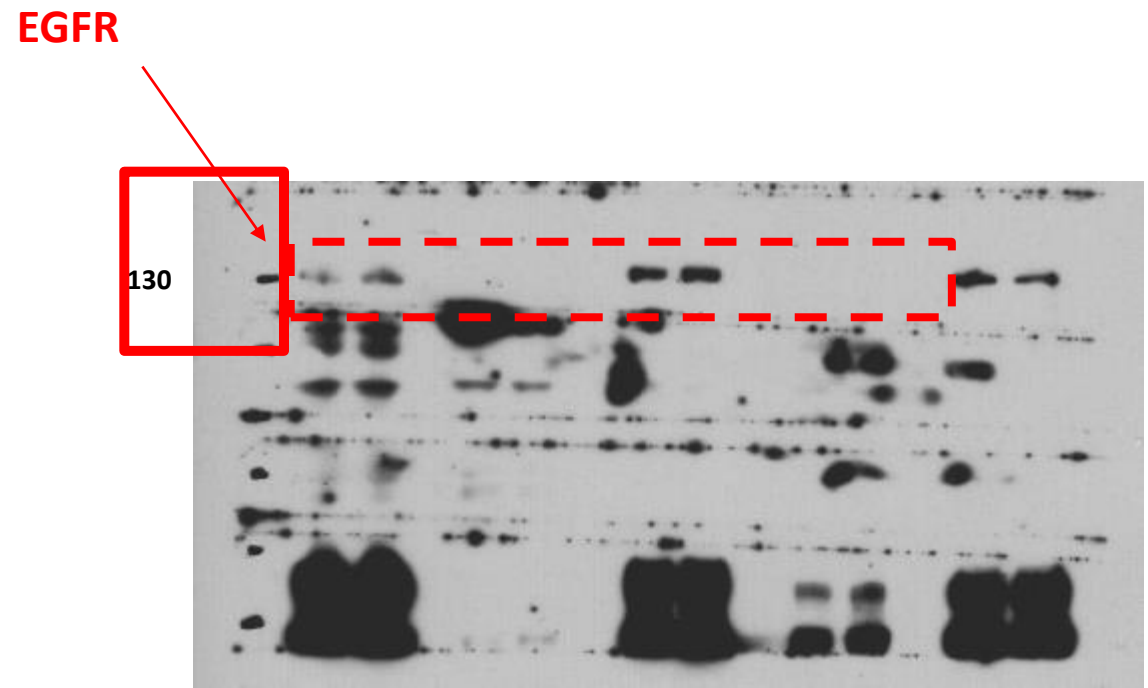

Long exposure x1

Fig 1F

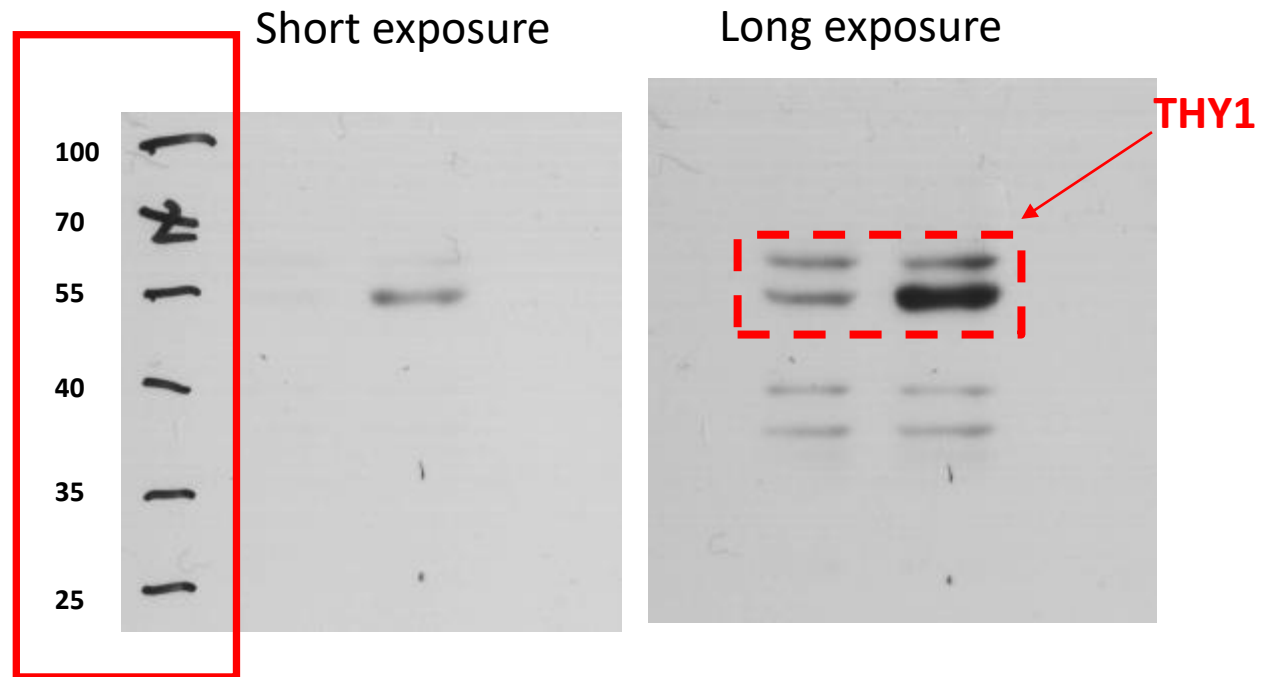

Fig 2B

Cytoplasmic B-catenin

Nuclear B-catenin

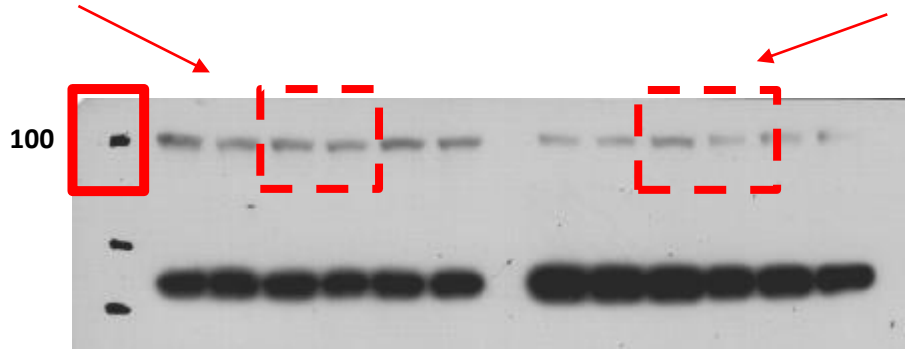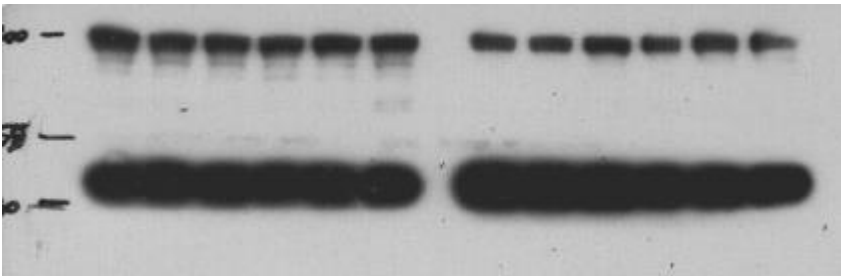

2017-10-31

Cytoplasmic p84

Nuclear p84

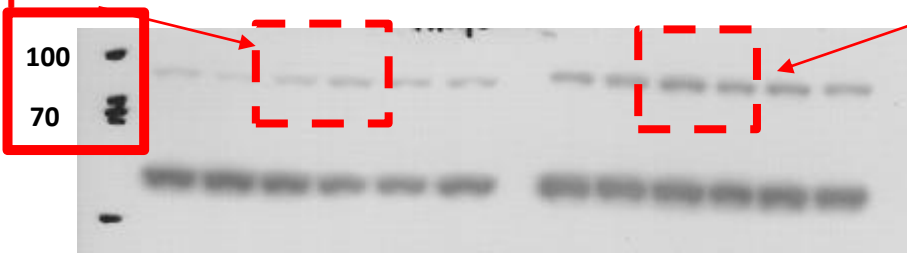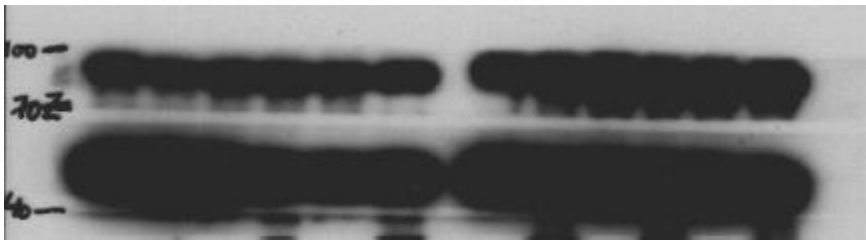

2017-10-27

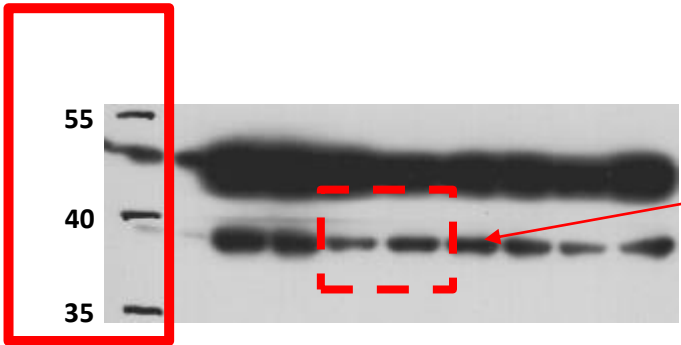

Cytoplasmic GAPDH

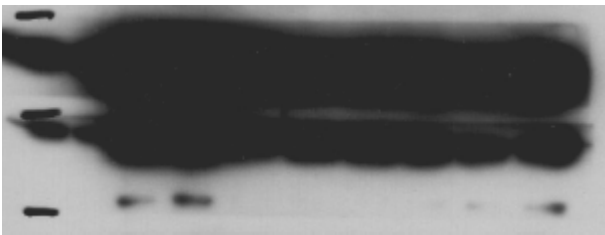

2017-11-07

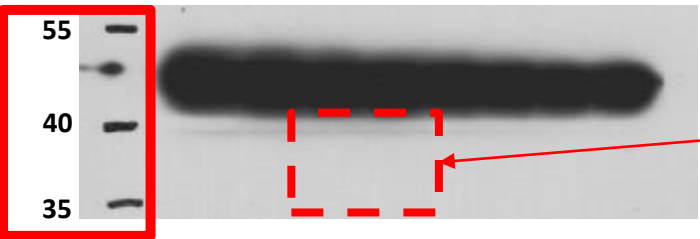

Nuclear GAPDH

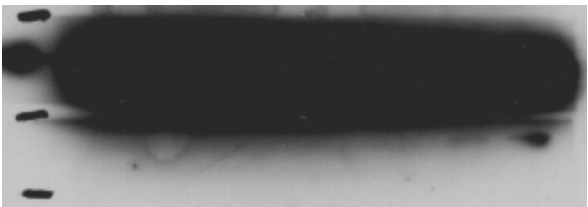

Short exposure

Long exposure

Fig 2C

HONE1

Vimentin

B-actin

Short exposure

Long exposure x1

Long exposure x2

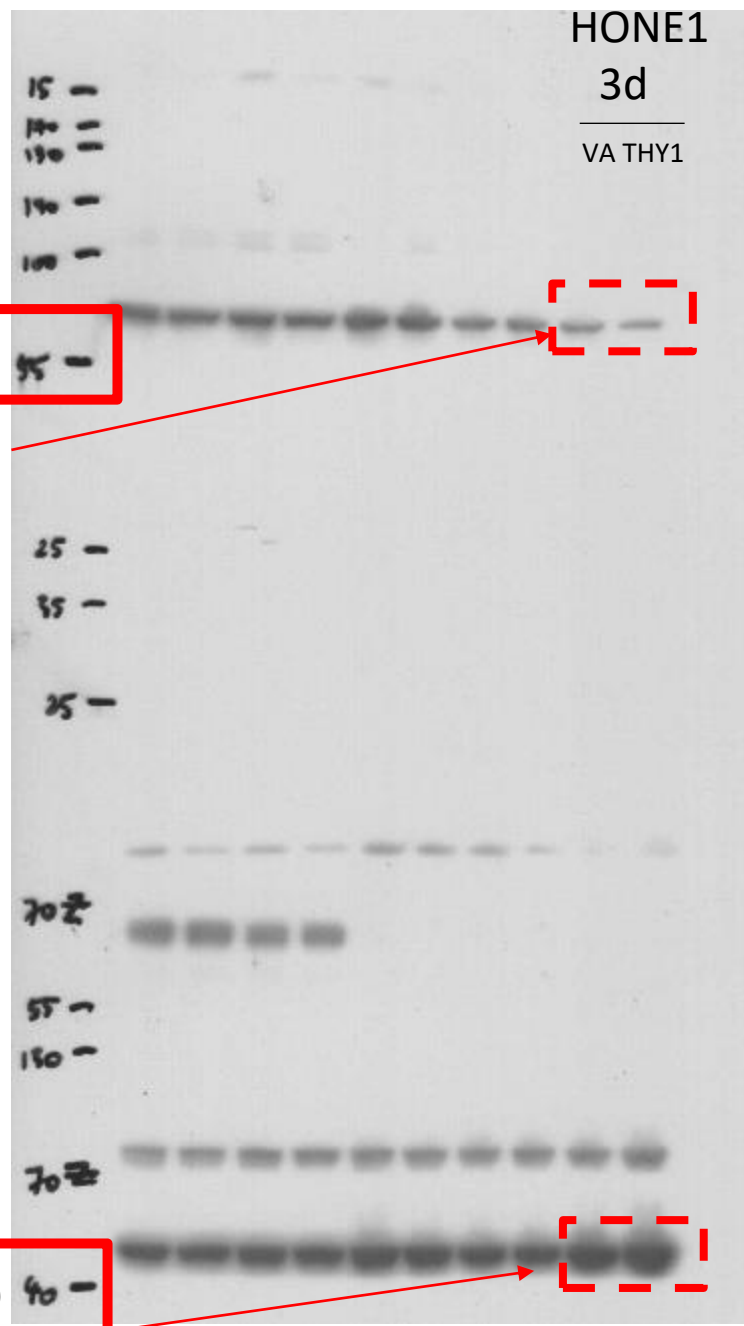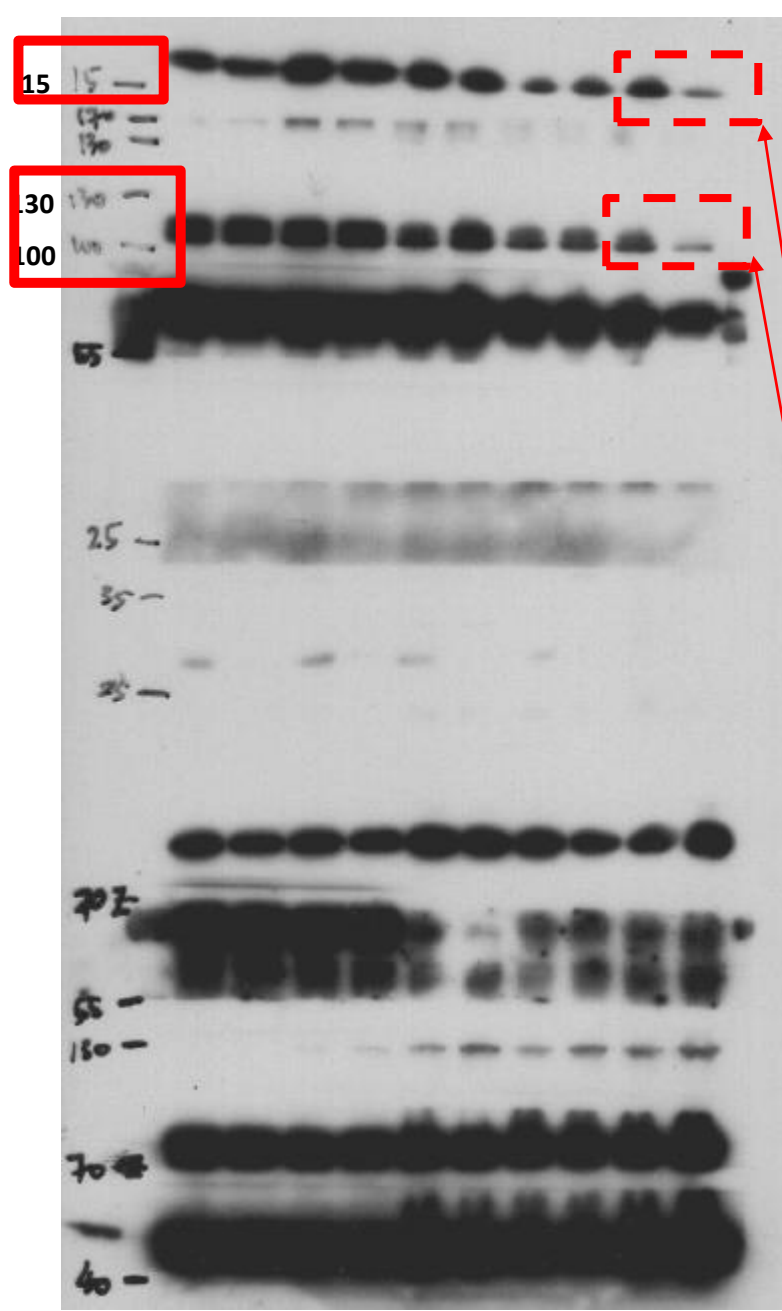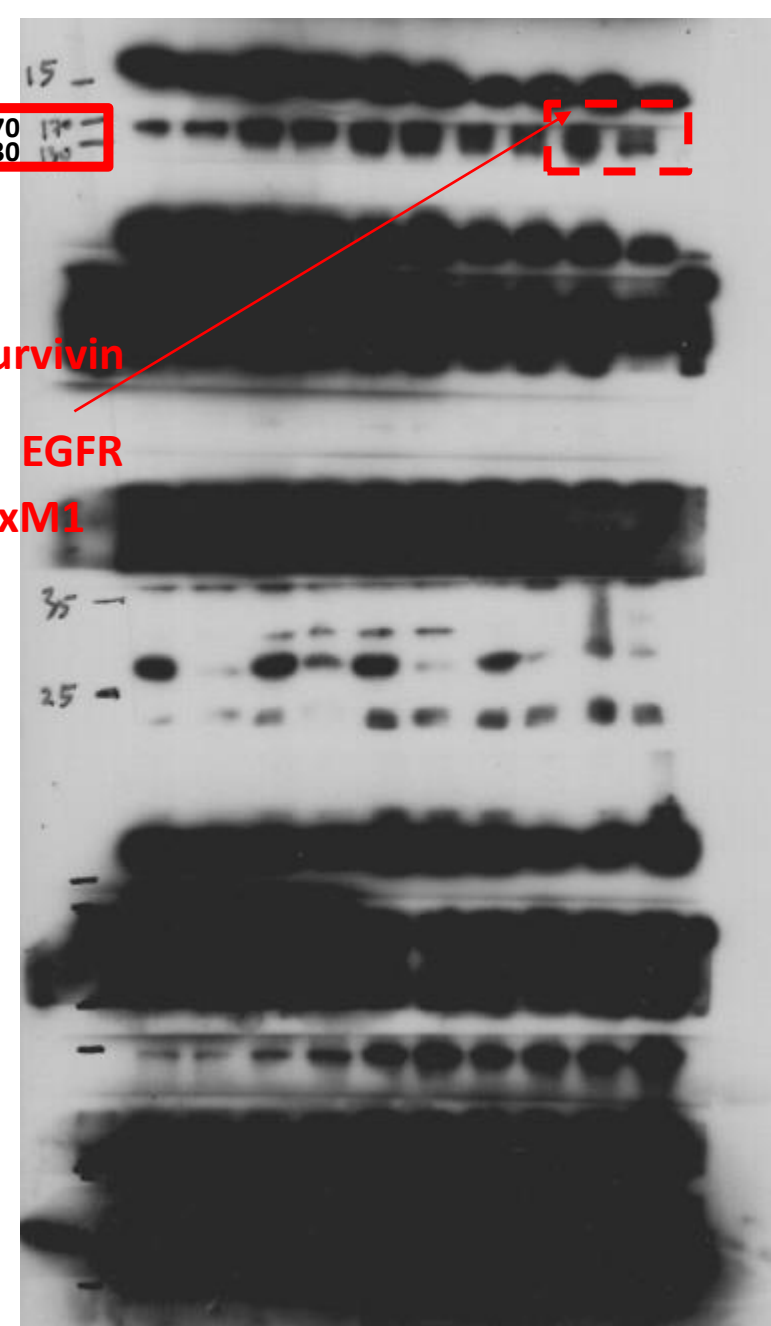

Survivin

EGFR

FoxM1



Fig 2C

NPC43

NPC43

3d

VA THY1

EGFR

Survivin

170  
130

25

130  
100

70  
55

FoxM1

Vimentin

40

B-actin

Short exposure

Long exposure x1

Long exposure x2

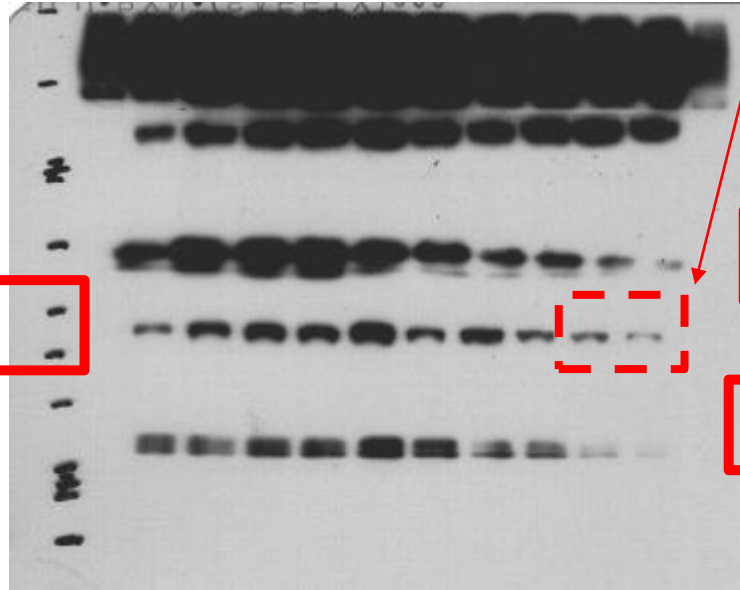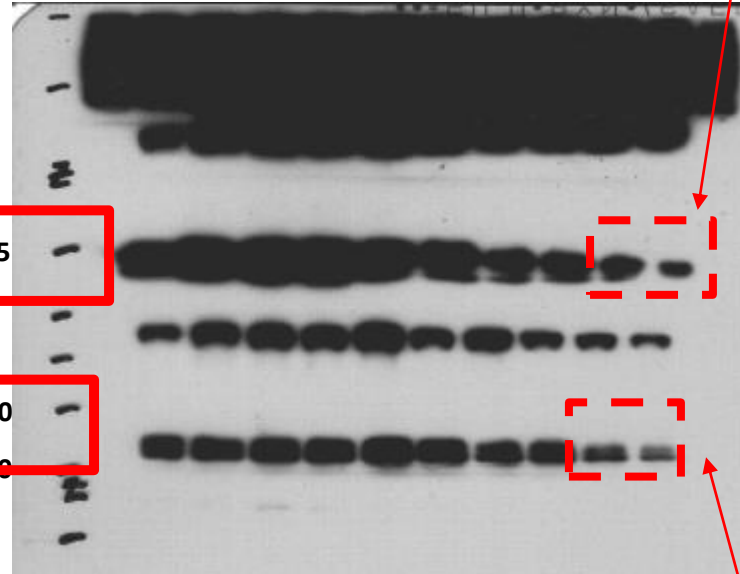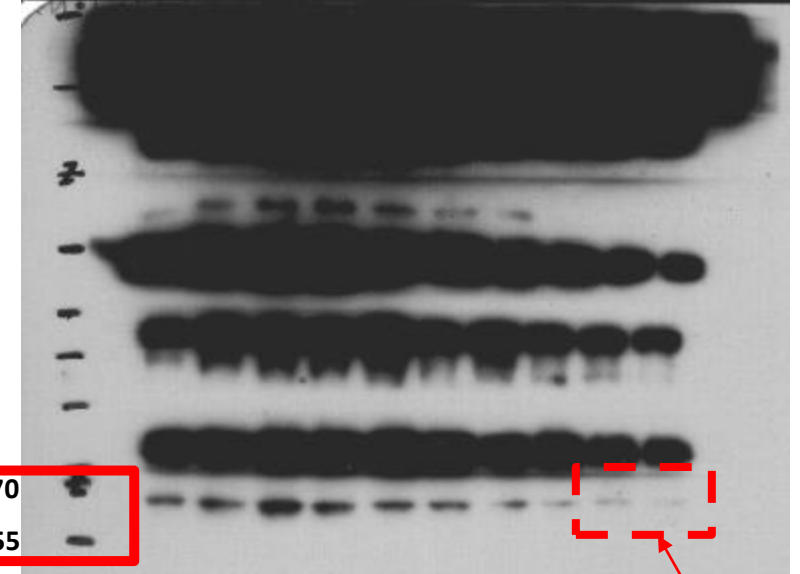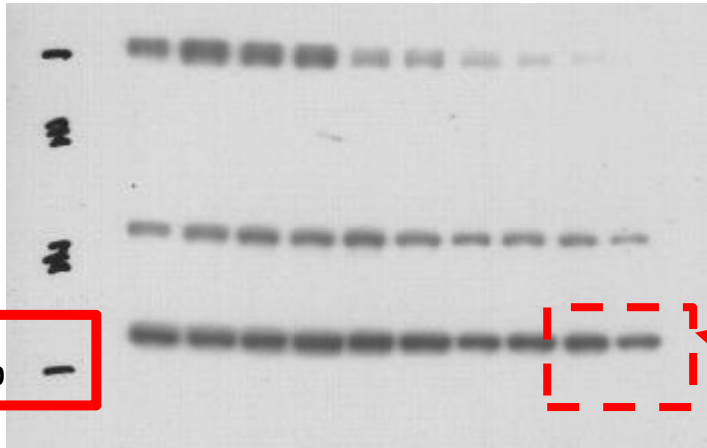

Fig 3A

HONE1

VA    THY1

pSRC

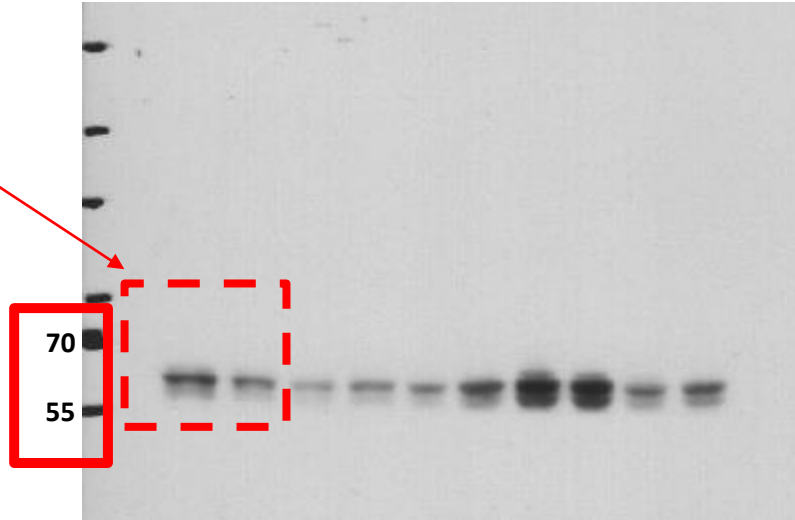

SRC

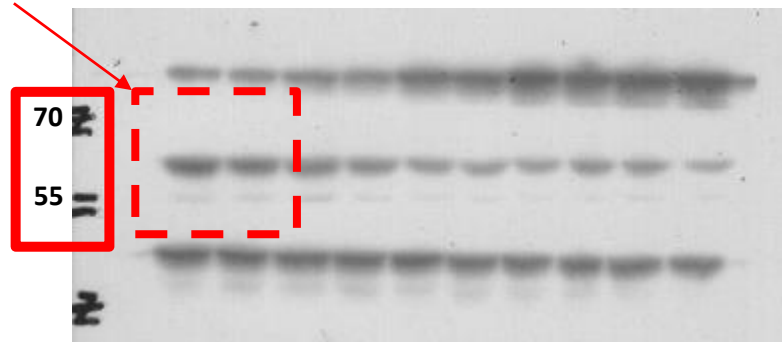

Short exposure

THY1

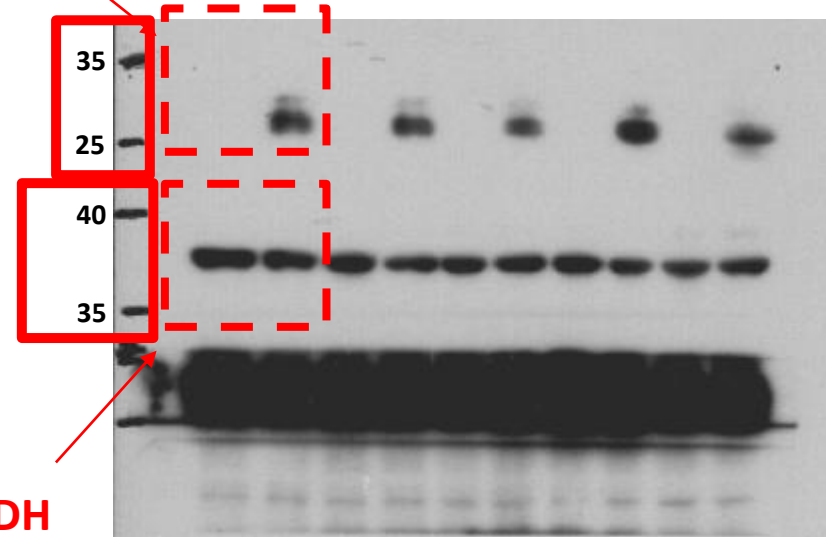

GAPDH

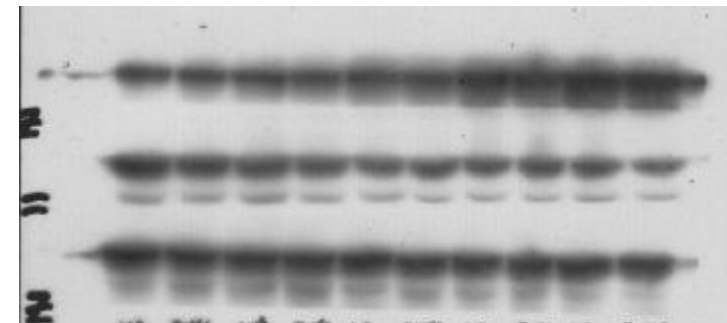

Long exposure

Fig 3A

NPC43

VA THY1

pSRC

THY1

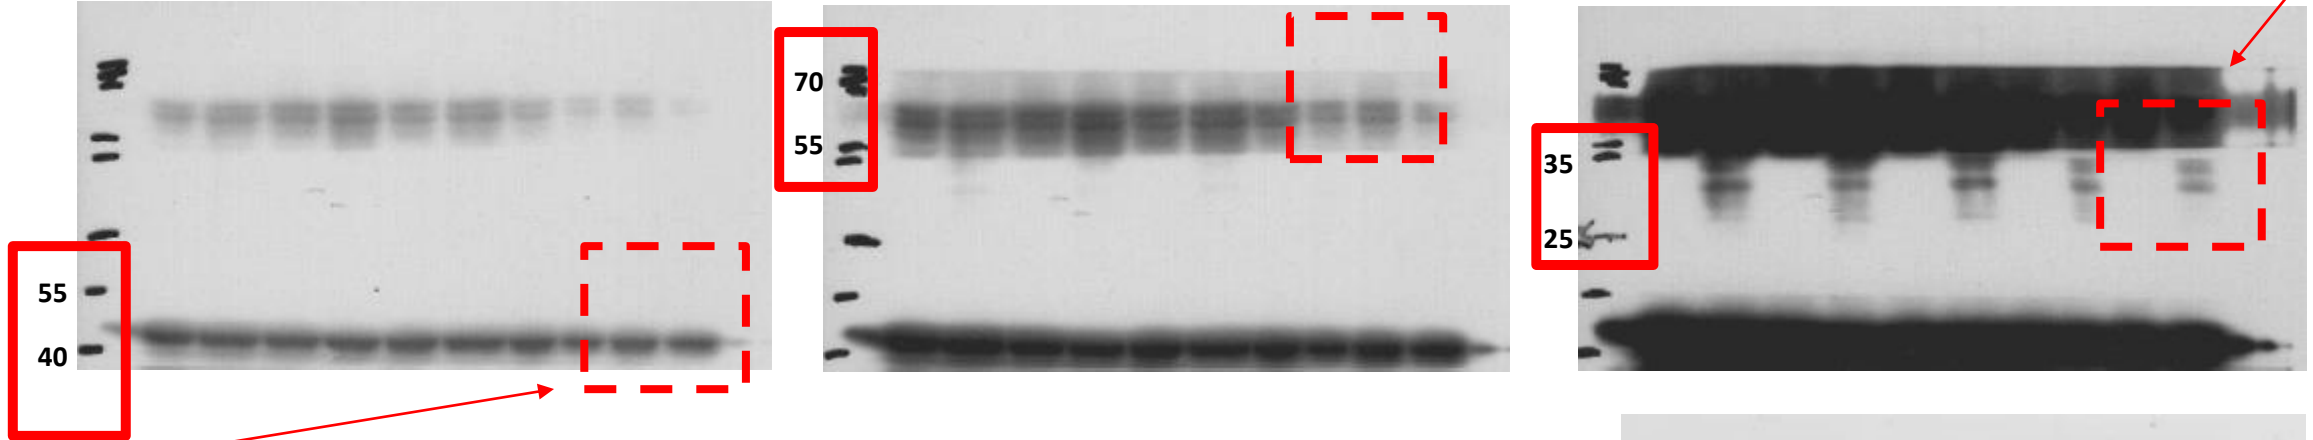

B-actin

SRC

Short exposure

Long exposure x1

Long exposure x2

Fig 3B

11.19

shCTL  
shTHY1

pSRC

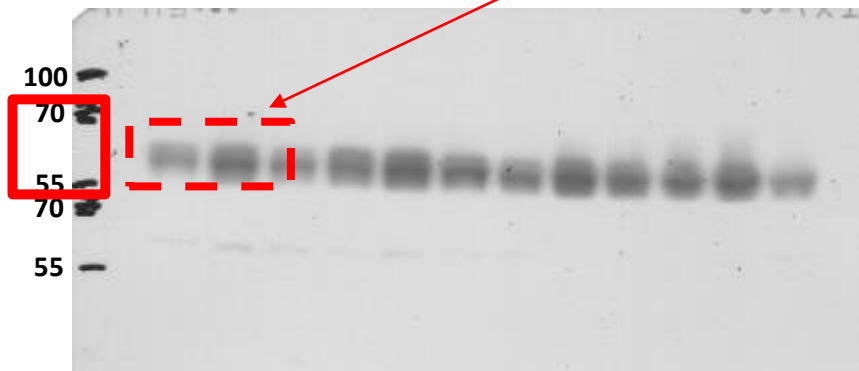

11.19

shCTL  
shTHY1

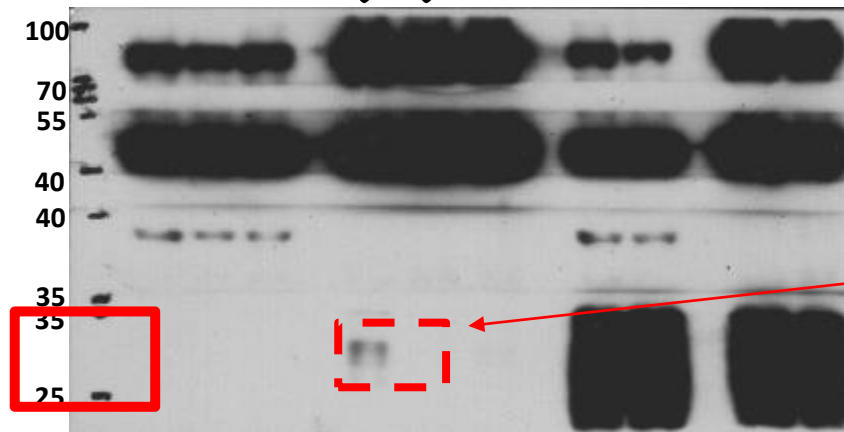

THY1

SRC

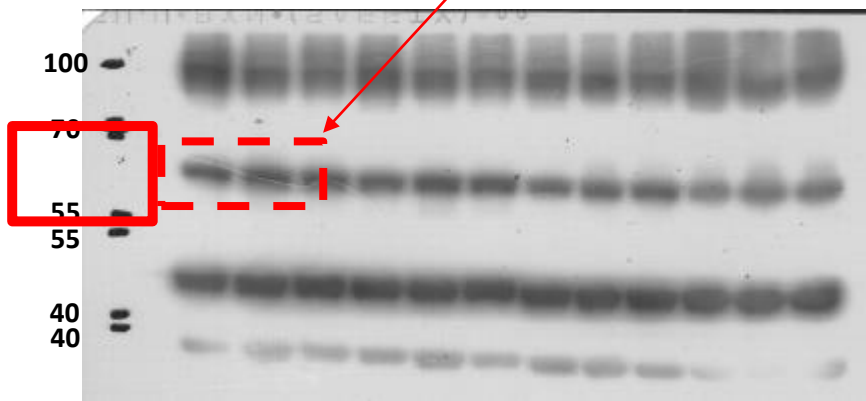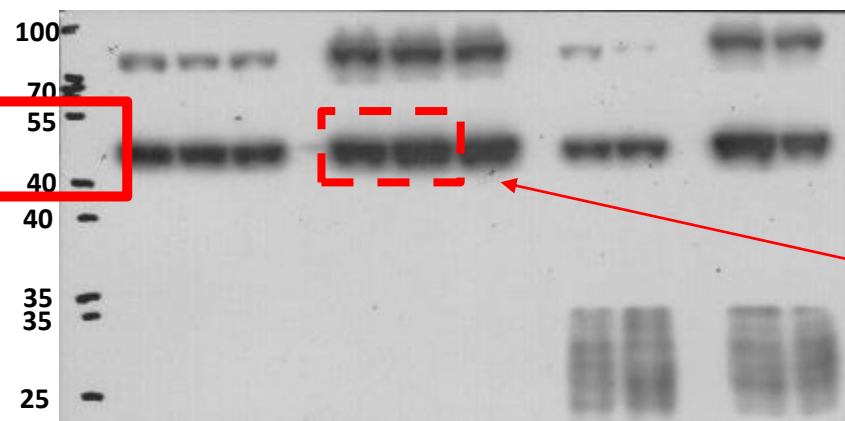

B-actin

Fig 3C

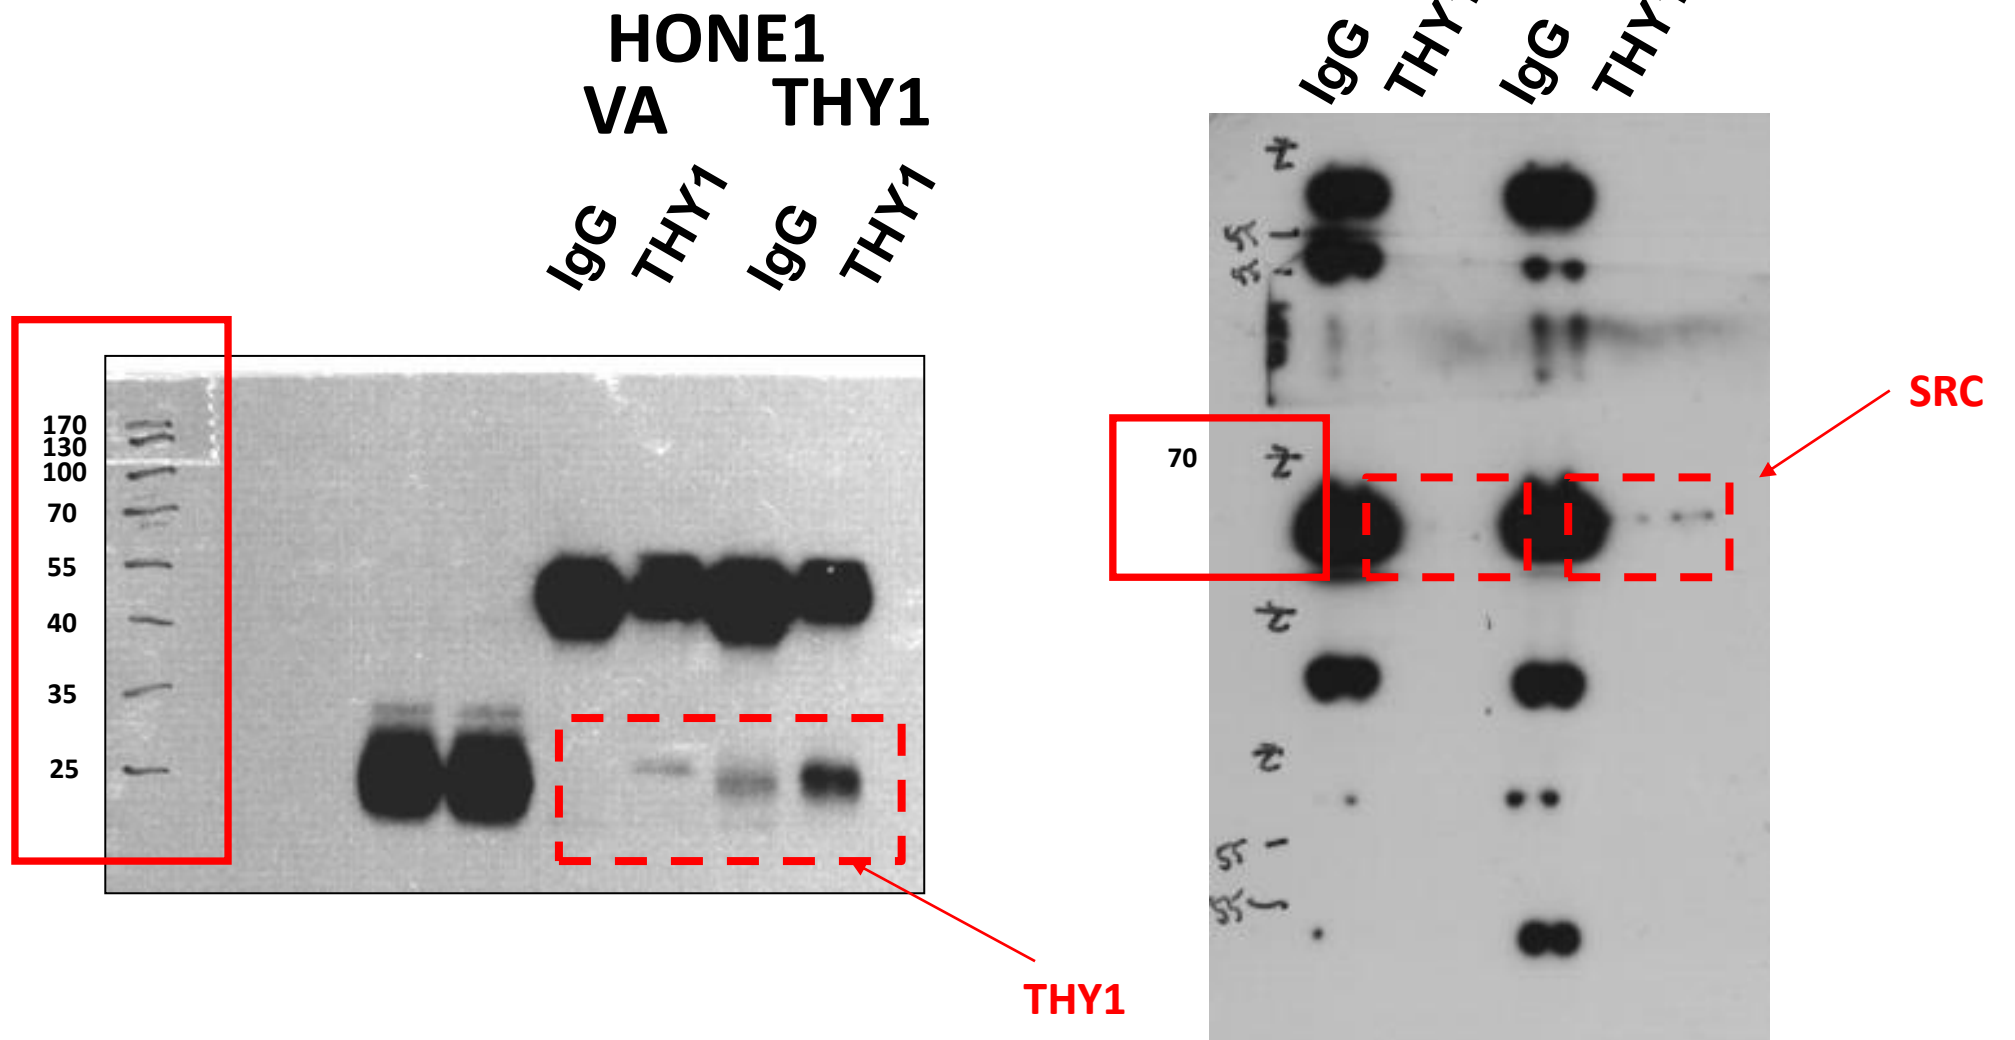

Fig 3D

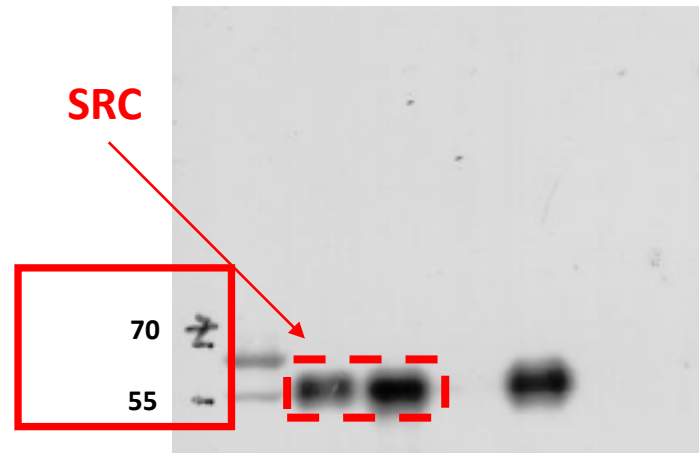

Fig 3E

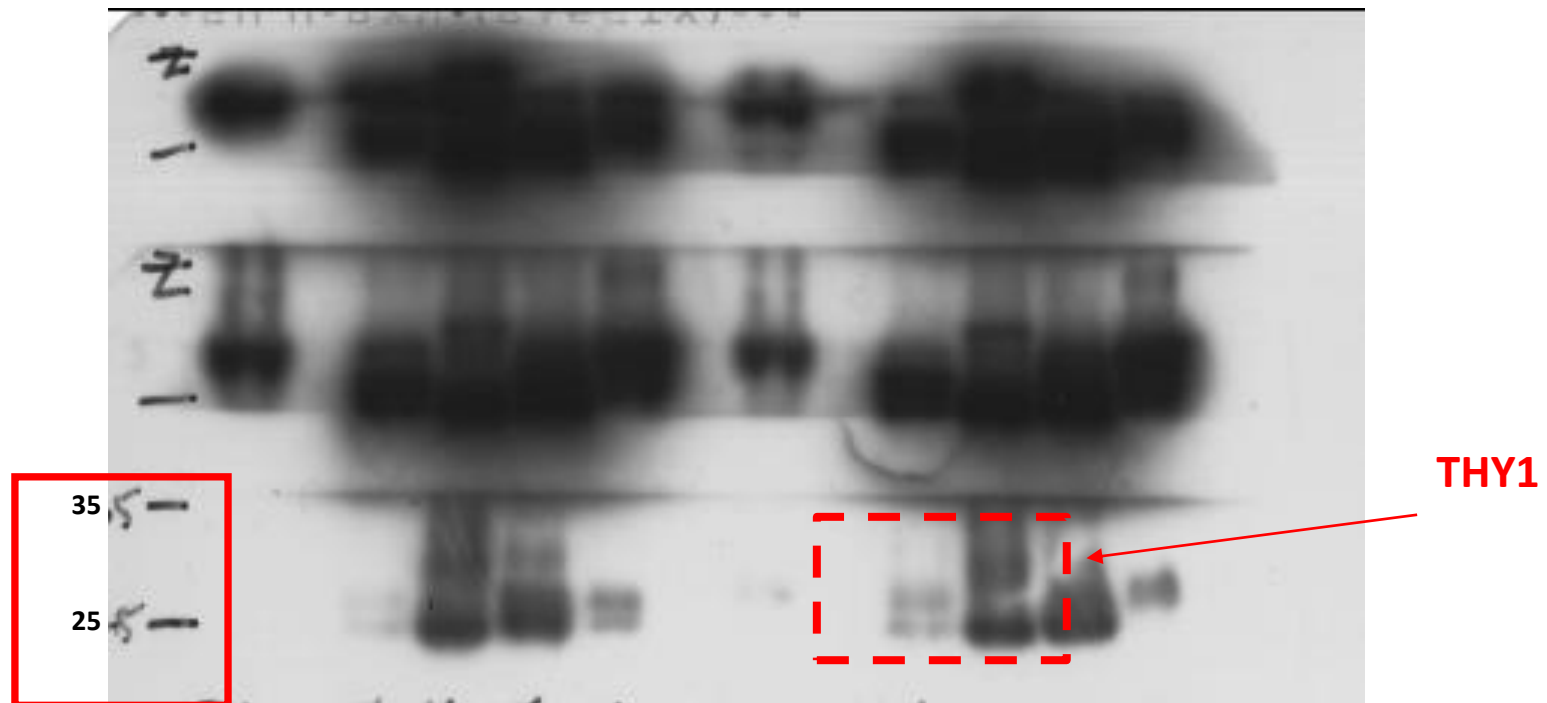

Fig 3F

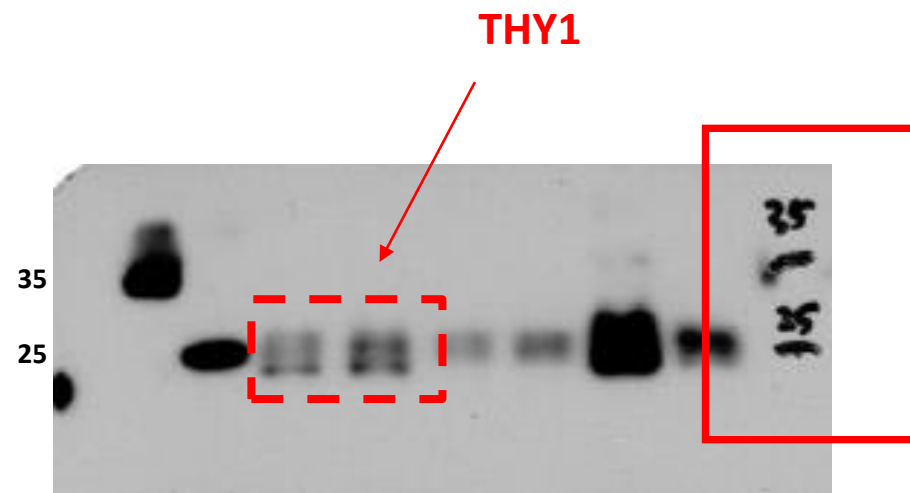



Fig 4A

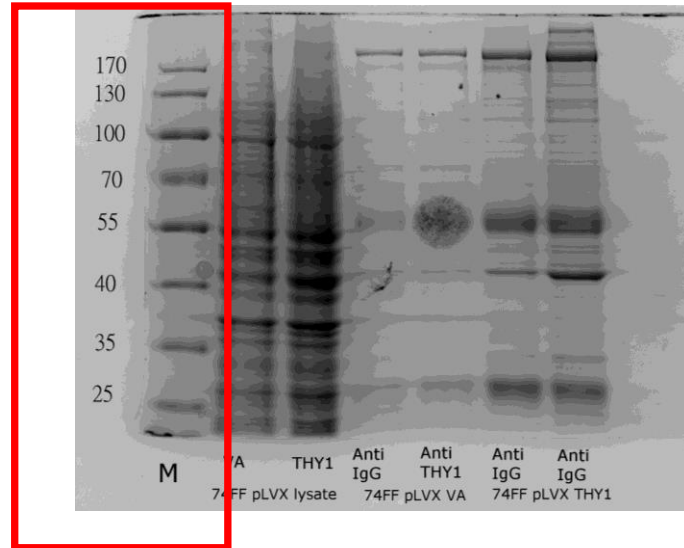

Fig 4B

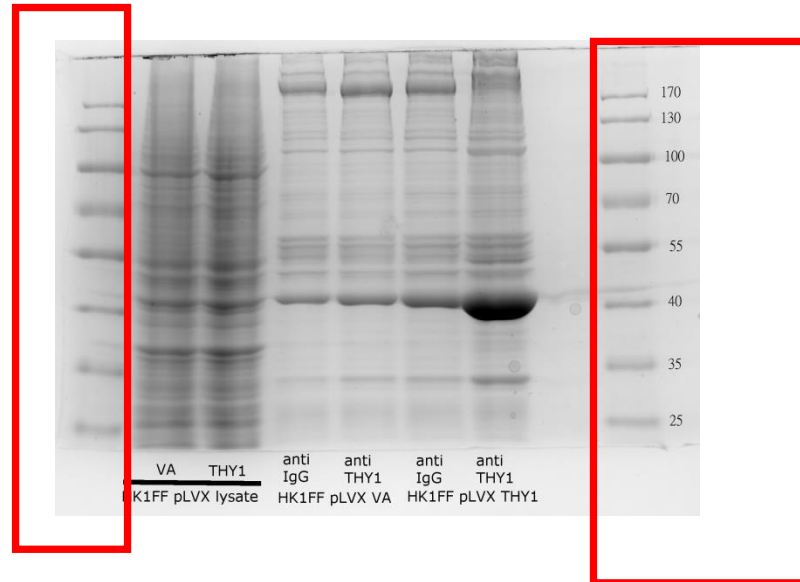

Fig 4C

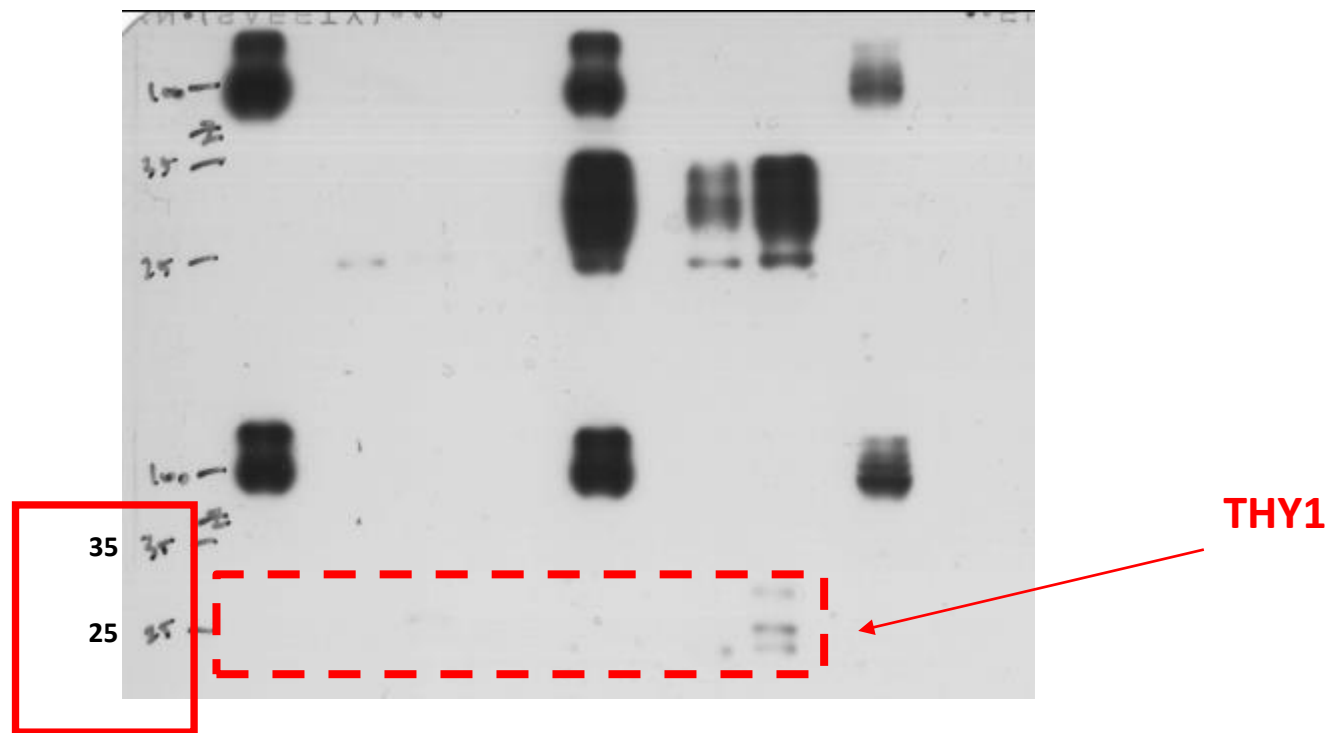

**Fig 4D**

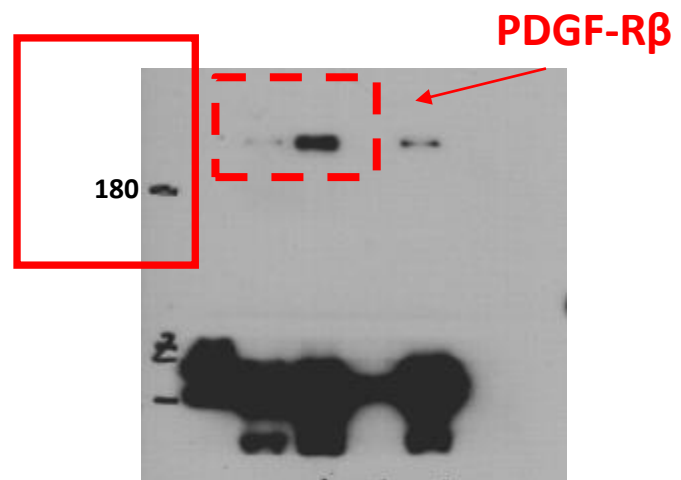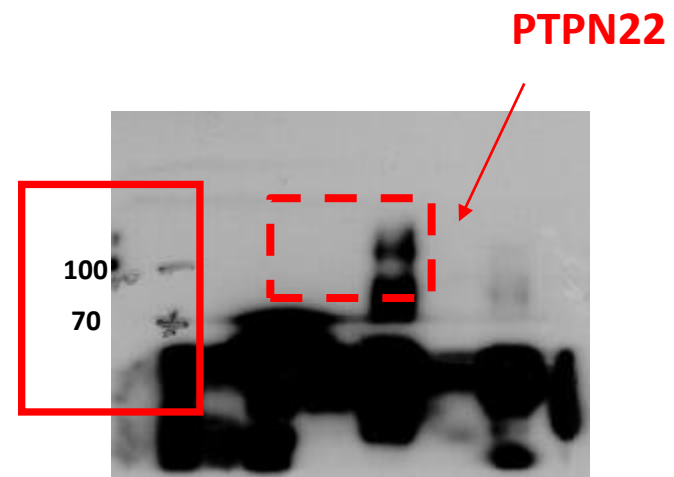

Fig 4F

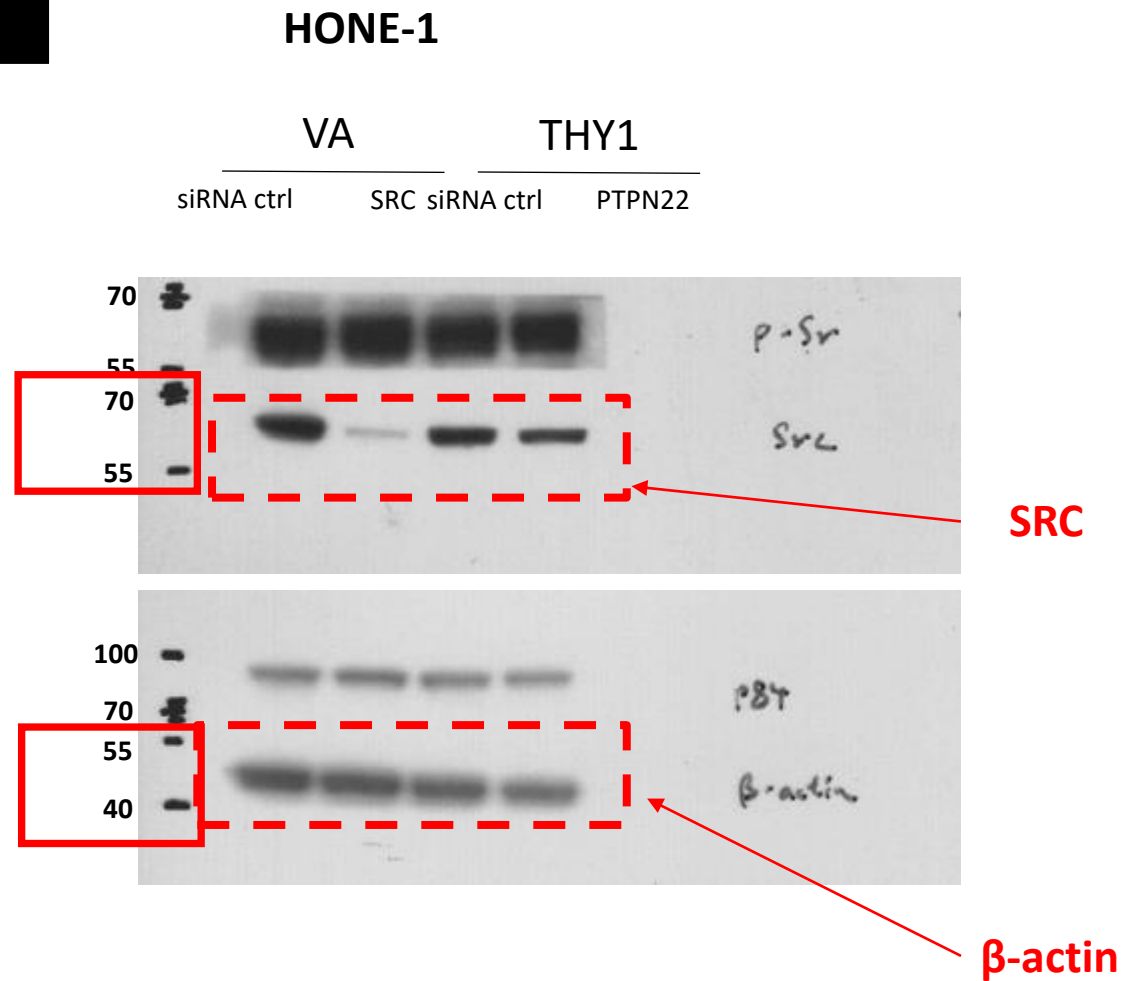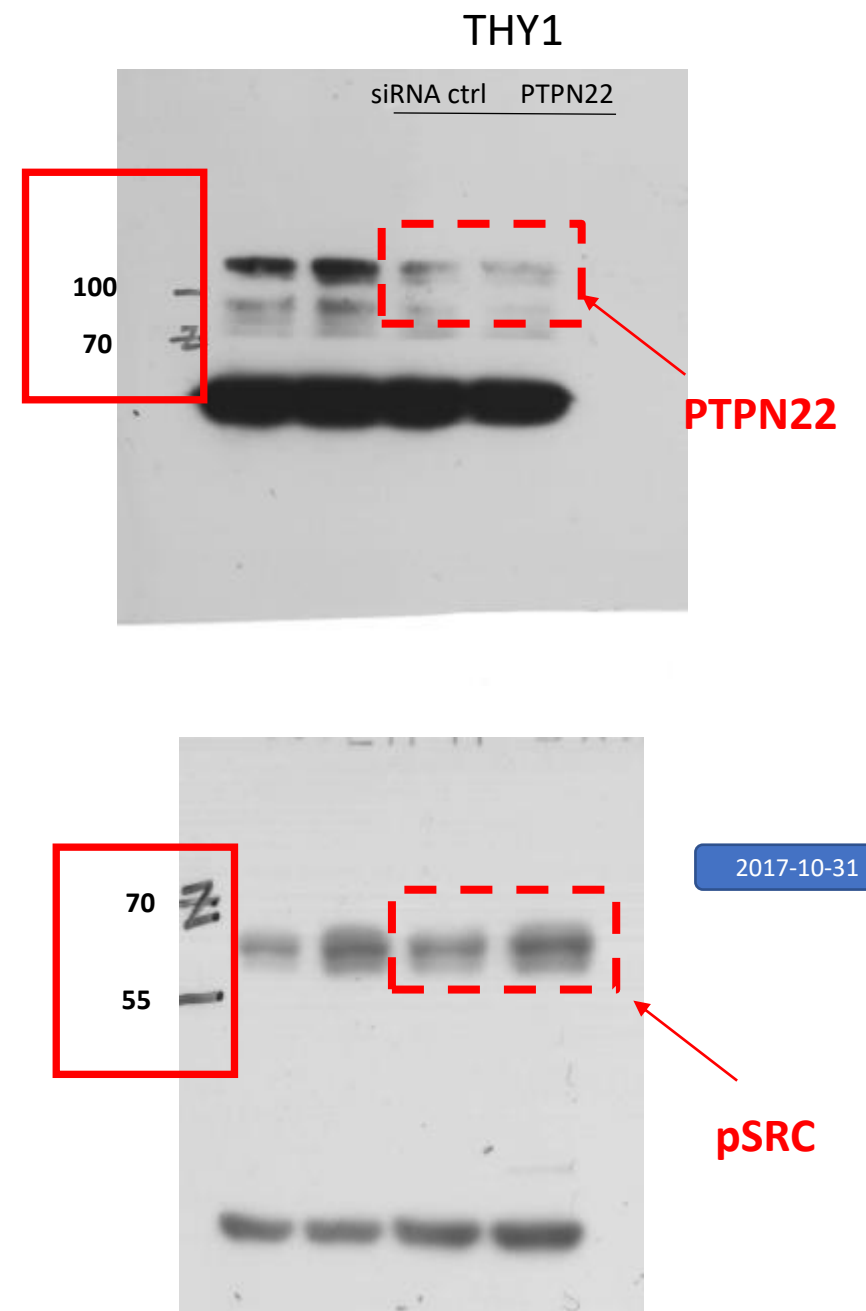

Fig 4J

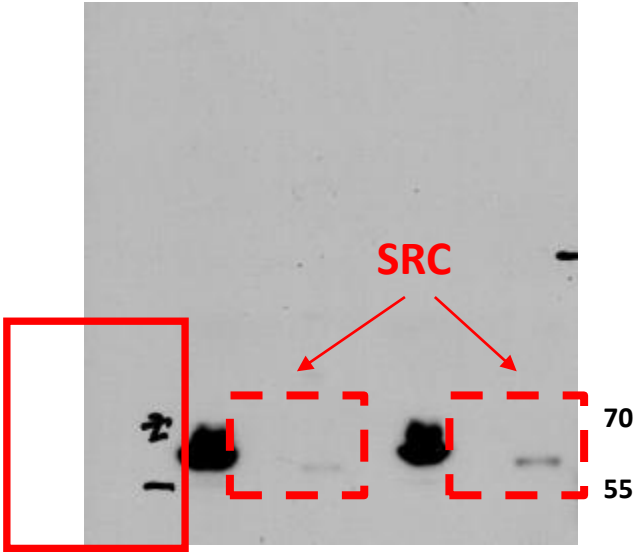

Fig 4K

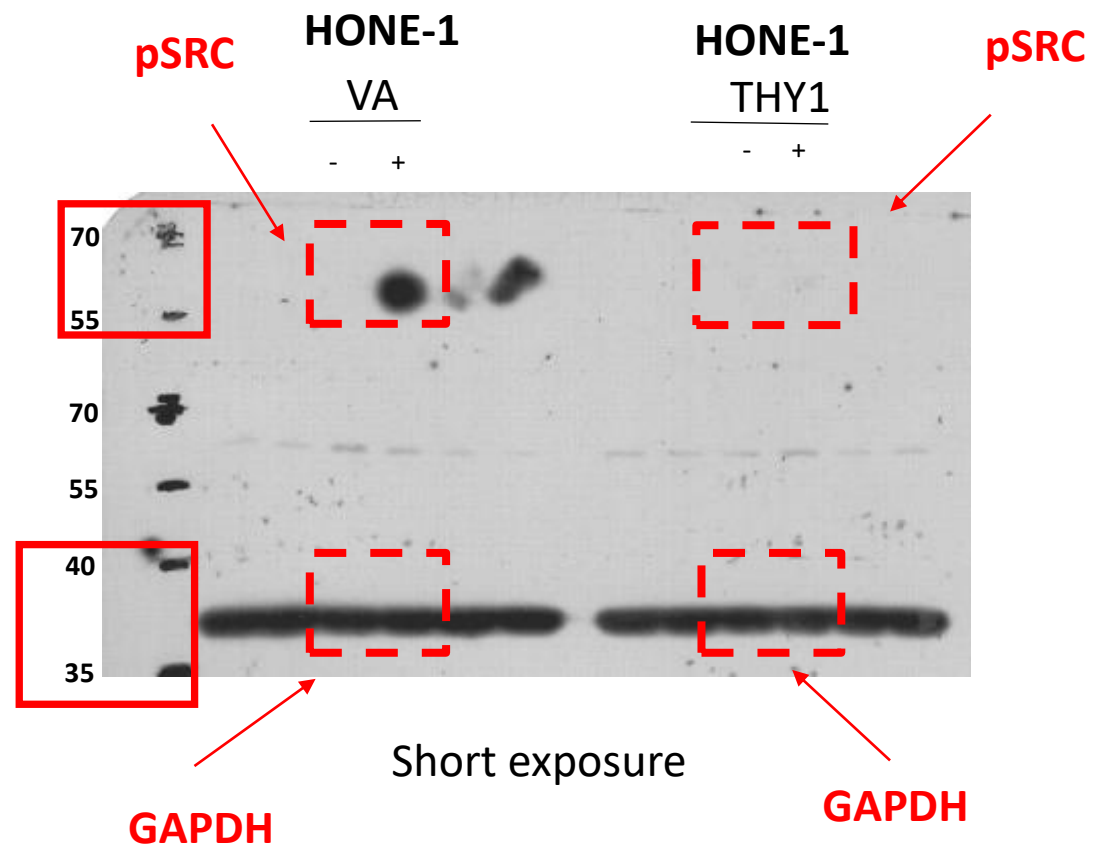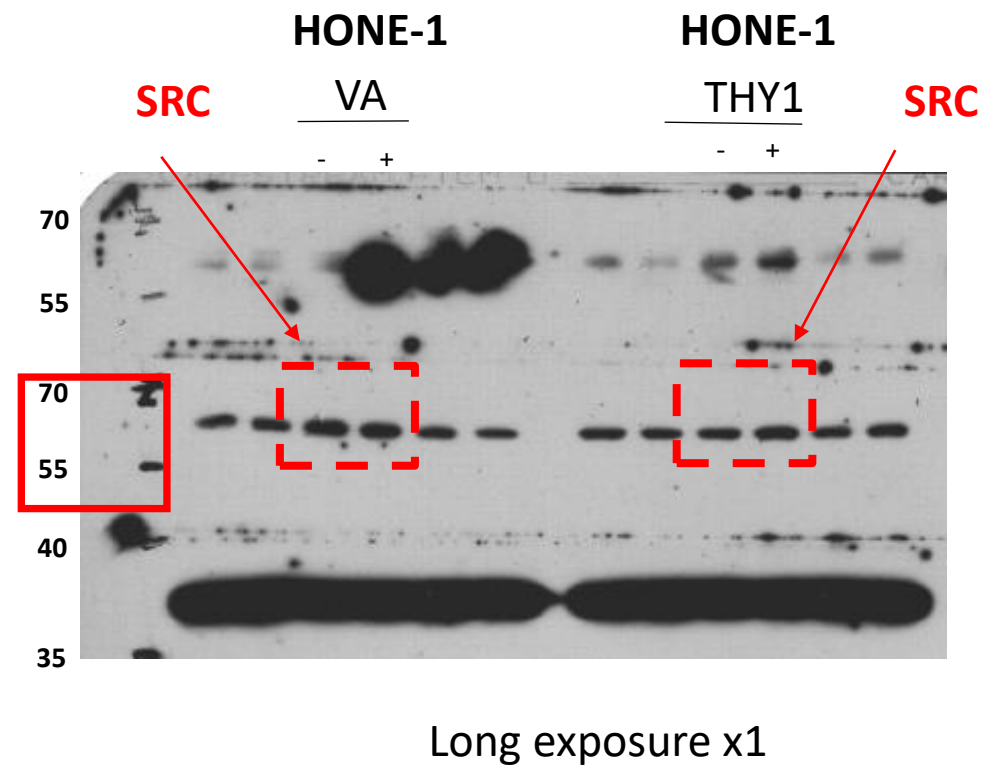

Supplement: s1 [file s1]
